# Supplementary material for: Responses of Grain Yield and Yield Related Parameters to Post-Heading Low-Temperature Stress in Japonica Rice
Source: MDPI journal article supplement (doi:10.3390/plants10071425), 2021-07-12
Supplement: s1 [file s1]

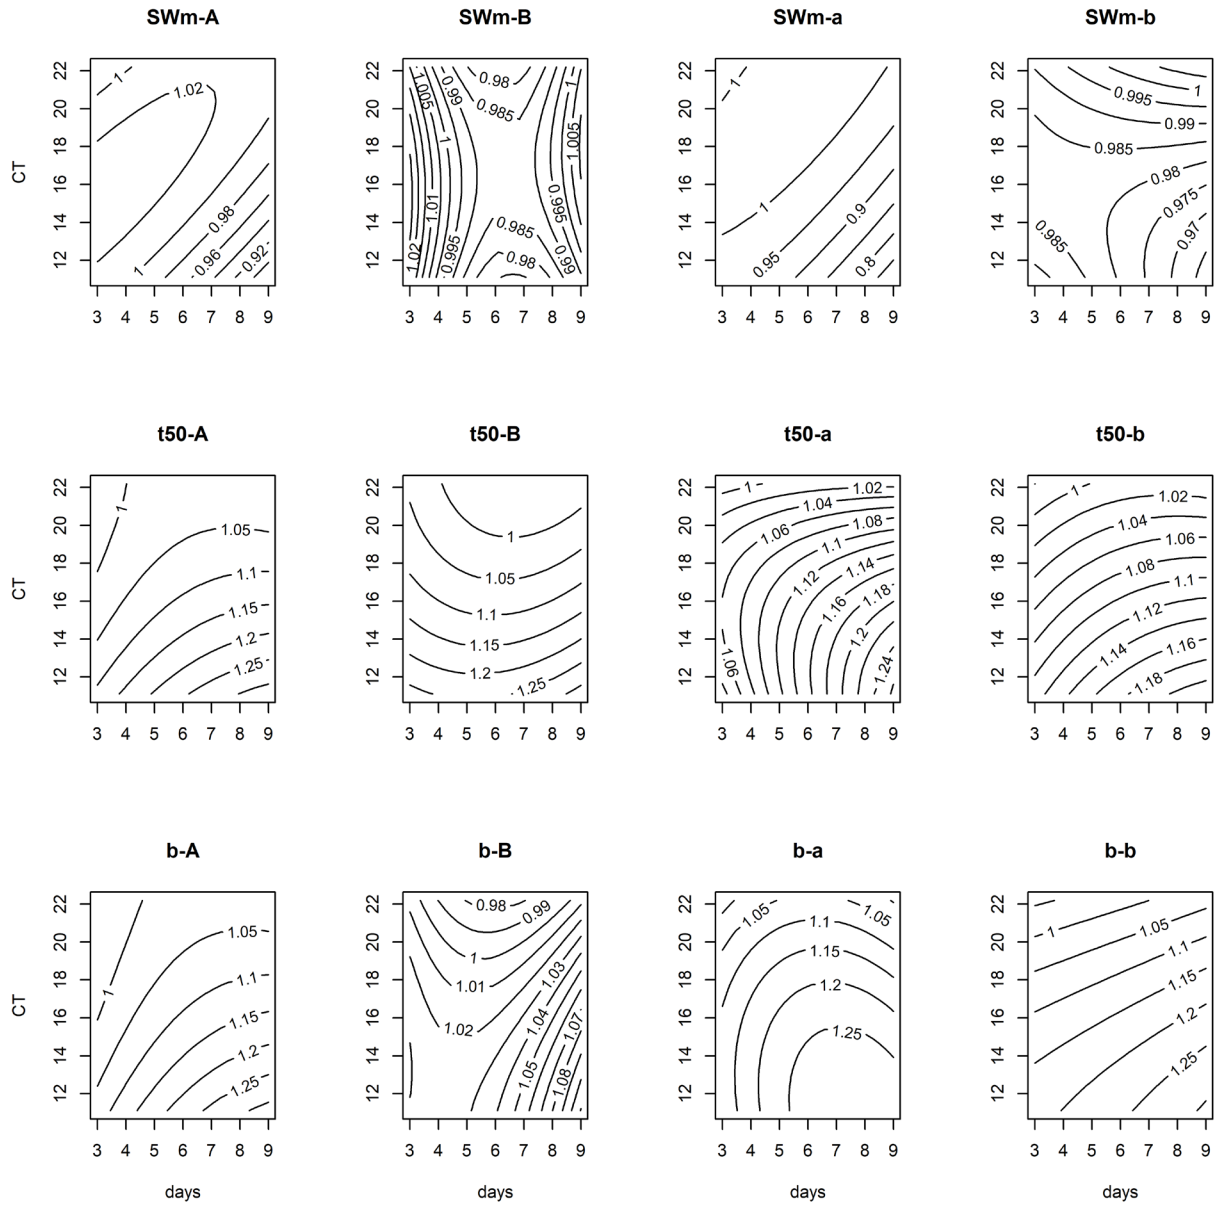

**Figure S1.** Contour plots for relative change in spikelet weight at maturity (SW<sub>m</sub>), days from flowering to 50% grain filling (t<sub>50</sub>) and shape or steepness of sigmoid curve (b) under varied low temperature stresses at flowering (A/a) and grain filling (B/b) stages in Huaidao 5 (A/B) and Nanjing 46 (a/b).

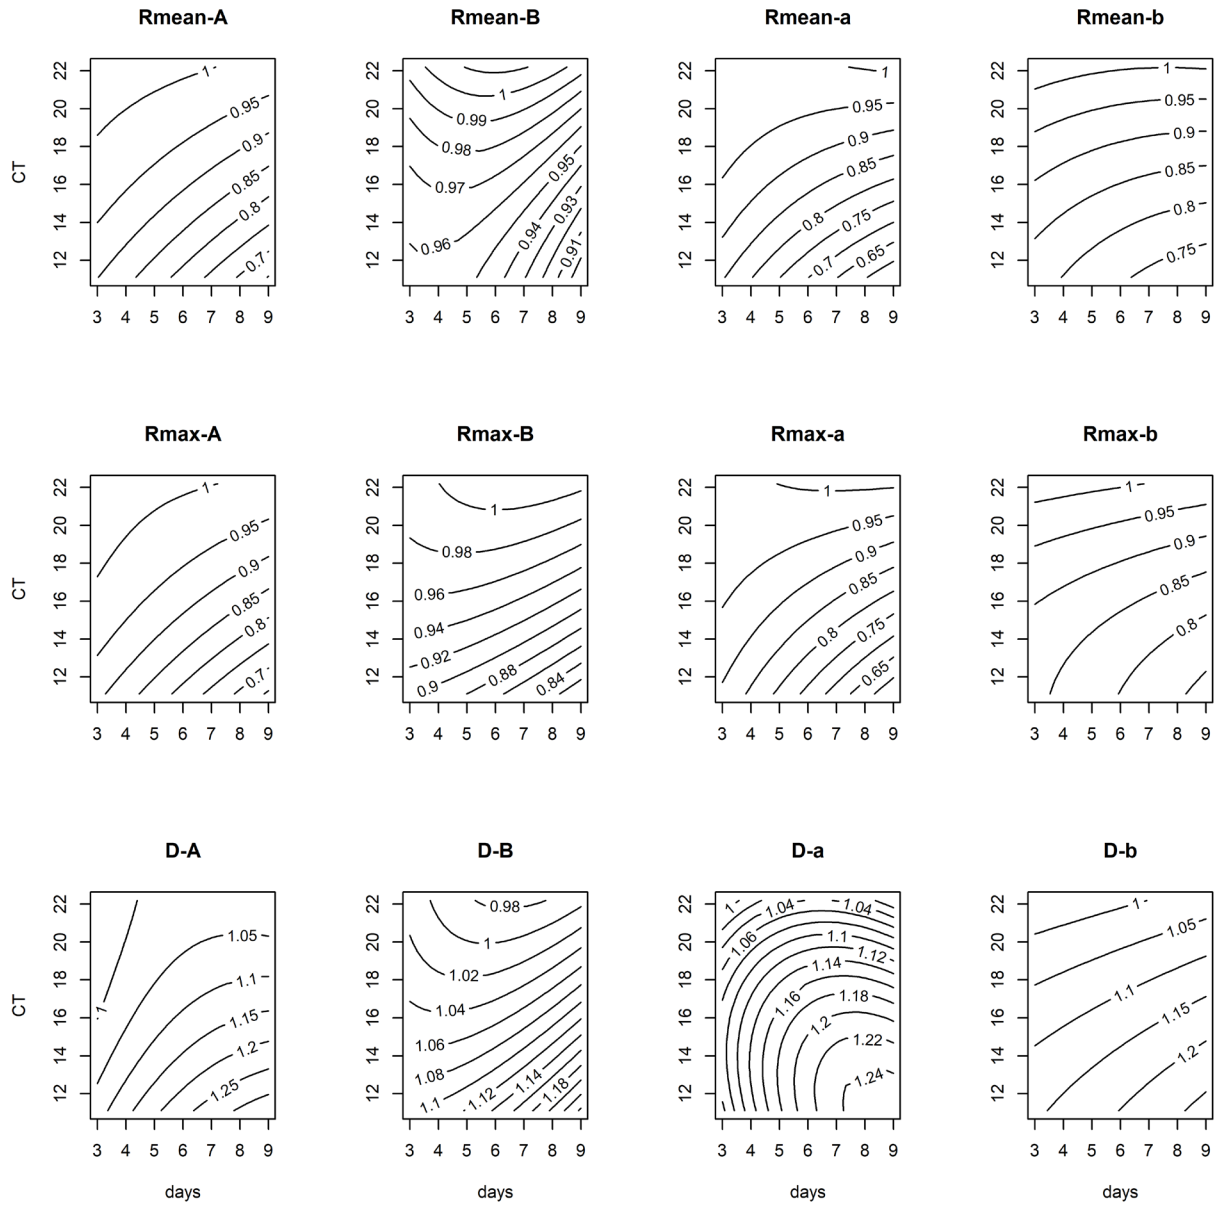

**Figure S2.** Contour plots for relative changes in maximum grain filling rate ( $R_{\max}$ ), mean grain filling rate ( $R_{\text{mean}}$ ) and the total days from flowering to 95% SWm (D) under varied low temperature stresses at flowering (A/a) and grain filling (B/b) stages in Huaidao 5 (A/B) and Nanjing 46 (a/b).

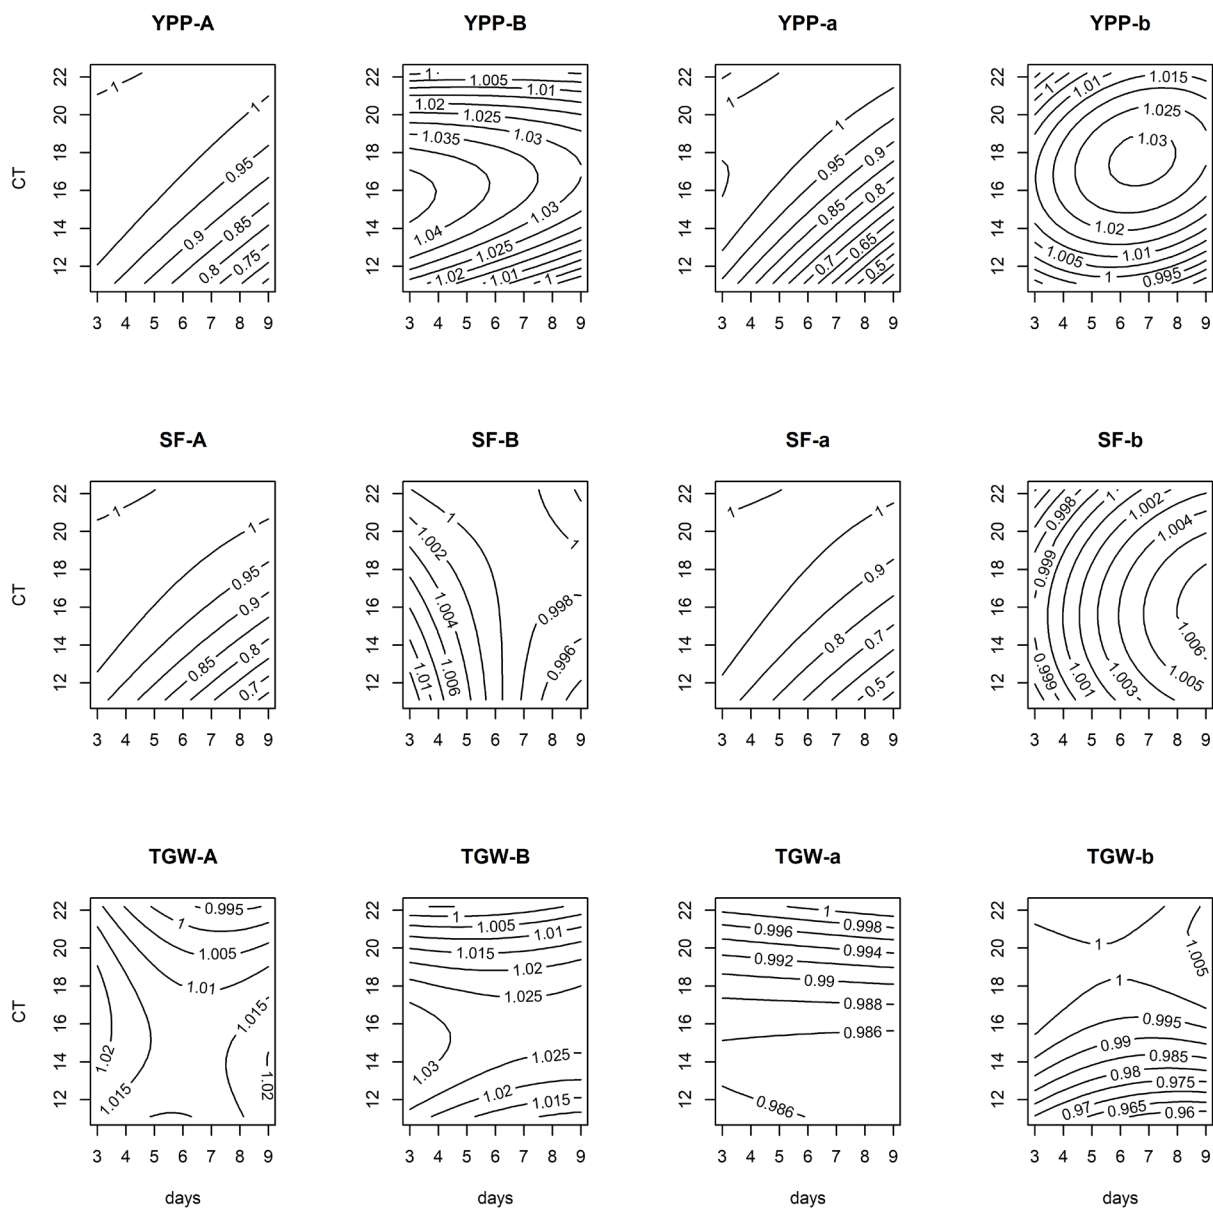

**Figure S3.** Contour plots for relative changes in yield per plant (YPP), spikelet fertility (SF) and thousand grain weight (TGW) under varied low temperature stresses at flowering (A/a) and grain filling (B/b) stages in Huaidao 5 (A/B) and Nanjing 46 (a/b).

Table S1. Variance analysis of grain yield and related parameters under post-heading low-temperature stress during two-year experiments in 2018-2019.

| Source            | SF<br>(%) | SNPP     | TGW<br>(g) | YPP<br>(g plant <sup>-1</sup> ) |
|-------------------|-----------|----------|------------|---------------------------------|
| Year (Y)          | 1.12      | 11.51*   | 3.75       | 4.12                            |
| Cultivar (C)      | 175.32**  | 326.61** | 970.2**    | 168.2**                         |
| Stage (S)         | 731.81**  | 2.66     | 15.27**    | 233.76**                        |
| Temperature (T)   | 199.75**  | 3.39     | 1.41       | 72.98**                         |
| Duration (D)      | 253.81**  | 0.01     | 0.27       | 102.43**                        |
| Y × C             | 0.13      | 0.44     | 0.01       | 0.26                            |
| Y × S             | 0.16      | 0.14     | 1.24       | 0.06                            |
| Y × T             | 1.91      | 2.39     | 0.99       | 1.62                            |
| Y × D             | 0.85      | 0.34     | 0.07       | 0.14                            |
| C × S             | 76.49**   | 0.1      | 10.7**     | 7.6**                           |
| C × T             | 13.94**   | 0.4      | 1.77       | 10.31**                         |
| C × D             | 12.79*    | 1.82     | 0.45       | 3.36                            |
| S × T             | 207.18**  | 5.79*    | 3.04       | 81.25**                         |
| S × D             | 255.95**  | 0.42     | 0.71       | 92.85**                         |
| T × D             | 71.07**   | 1.98     | 2.06       | 32.73**                         |
| Y × C × S         | 0.63      | 0.06     | 0.81       | 0.06                            |
| Y × C × T         | 2.04      | 0.29     | 0.08       | 1.54                            |
| Y × C × D         | 1.14      | 0.36     | 2.01       | 0.13                            |
| Y × S × T         | 2.23      | 1.2      | 3.12       | 4.17*                           |
| Y × S × D         | 1.51      | 0.36     | 1.54       | 0.17                            |
| Y × T × D         | 2.33      | 1.07     | 0.9        | 2.45                            |
| C × S × T         | 11.96*    | 0.73     | 0.75       | 4.46*                           |
| C × S × D         | 22.6**    | 0.54     | 0.56       | 6.73*                           |
| C × T × D         | 3.7       | 0.96     | 1.05       | 1.32                            |
| S × T × D         | 65.07**   | 1.84     | 1.61       | 15.36**                         |
| Y × C × S × T     | 2.19      | 1.38     | 0.56       | 1.57                            |
| Y × C × S × D     | 0.17      | 1.59     | 2.12       | 0.1                             |
| Y × C × T × D     | 2.43      | 1.19     | 1.18       | 0.84                            |
| Y × S × T × D     | 0.95      | 1.85     | 0.29       | 1.46                            |
| C × S × T × D     | 5.49*     | 0.75     | 0.54       | 3.79                            |
| Y × C × S × T × D | 1.7       | 0.98     | 0.25       | 0.98                            |

Note: The numbers in the table indicate the F values. \* and \*\* indicate significant difference at  $p < 0.05$  and  $p < 0.001$ , respectively. SF: spikelet fertility; TGW: thousand-grain weight; SNPP: spikelet number per panicle; YPP: yield per plant.

Table S2. Parameters of the response surface model fitted on yield as well as yield and grain filling related parameters under varied low temperature stresses

|                 |                | Huaidao 5 |        |         |               |        |         | Nanjing 46 |        |         |               |        |         |
|-----------------|----------------|-----------|--------|---------|---------------|--------|---------|------------|--------|---------|---------------|--------|---------|
|                 |                | Flowering |        |         | Grain filling |        |         | Flowering  |        |         | Grain filling |        |         |
| Parameters      |                | Estimate  | SE     | P value | Estimate      | SE     | P value | Estimate   | SE     | P value | Estimate      | SE     | P value |
| SW <sub>m</sub> | a              | 0.9074    | 0.2109 | 0.0051  | 1.0605        | 0.1437 | 0.0003  | 0.775      | 0.1771 | 0.0047  | 1.0908        | 0.0883 | 0       |
|                 | b              | 0.0209    | 0.0231 | 0.4002  | 0.0101        | 0.0157 | 0.5447  | 0.0337     | 0.0194 | 0.1323  | -0.011        | 0.0097 | 0.298   |
|                 | c              | -0.0238   | 0.0299 | 0.4562  | -0.05         | 0.0203 | 0.0494  | -0.0358    | 0.0251 | 0.2032  | -0.0103       | 0.0125 | 0.4423  |
|                 | d              | 0.0024    | 0.0009 | 0.039   | 0.0003        | 0.0006 | 0.6248  | 0.0041     | 0.0008 | 0.0016  | 0.0007        | 0.0004 | 0.1093  |
|                 | e              | -0.0009   | 0.0007 | 0.2137  | -0.0004       | 0.0005 | 0.4583  | -0.0014    | 0.0006 | 0.0508  | 0.0003        | 0.0003 | 0.3837  |
|                 | f              | -0.002    | 0.0021 | 0.379   | 0.0035        | 0.0015 | 0.0536  | -0.0044    | 0.0018 | 0.0507  | -0.0002       | 0.0009 | 0.8282  |
|                 | R <sup>2</sup> | 0.7695    | 0      | 0       | 0.5663        | 0      | 0       | 0.9582     | 0      | 0       | 0.6226        | 0      | 0       |
| t <sub>50</sub> | a              | 1.2576    | 0.1822 | 0.0005  | 1.869         | 0.4019 | 0.0035  | 0.4616     | 0.2236 | 0.0845  | 1.097         | 0.1792 | 0.0009  |
|                 | b              | -0.0431   | 0.0199 | 0.0739  | -0.0574       | 0.044  | 0.2393  | 0.0564     | 0.0245 | 0.0605  | -0.0062       | 0.0196 | 0.7613  |
|                 | c              | 0.1019    | 0.0258 | 0.0075  | -0.0377       | 0.0569 | 0.5318  | 0.0812     | 0.0316 | 0.0425  | 0.0476        | 0.0254 | 0.1097  |
|                 | d              | -0.0028   | 0.0008 | 0.0108  | -0.0018       | 0.0017 | 0.3289  | -0.0031    | 0.001  | 0.0178  | -0.0011       | 0.0008 | 0.1879  |
|                 | e              | 0.0012    | 0.0006 | 0.0826  | 0.0013        | 0.0013 | 0.3506  | -0.0015    | 0.0007 | 0.0729  | -0.0001       | 0.0006 | 0.9119  |
|                 | f              | -0.0029   | 0.0019 | 0.1636  | 0.0056        | 0.0041 | 0.2201  | -0.0007    | 0.0023 | 0.7659  | -0.0015       | 0.0018 | 0.4424  |
|                 | R <sup>2</sup> | 0.9661    | 0      | 0       | 0.8703        | 0      | 0       | 0.9312     | 0      | 0       | 0.9313        | 0      | 0       |
| b               | a              | 1.1       | 0.2855 | 0.0084  | 0.9902        | 0.1564 | 0.0007  | 0.4228     | 0.6447 | 0.5363  | 1.1159        | 0.6406 | 0.1321  |
|                 | b              | -0.0305   | 0.0312 | 0.3661  | 0.0115        | 0.0171 | 0.5265  | 0.0535     | 0.0705 | 0.4772  | 0.0128        | 0.0701 | 0.8611  |
|                 | c              | 0.109     | 0.0404 | 0.0357  | -0.0142       | 0.0221 | 0.5457  | 0.1547     | 0.0912 | 0.1409  | 0.0197        | 0.0907 | 0.8351  |
|                 | d              | -0.0028   | 0.0012 | 0.0626  | -0.0012       | 0.0007 | 0.1181  | -0.0023    | 0.0028 | 0.4298  | -0.0004       | 0.0027 | 0.8764  |
|                 | e              | 0.0009    | 0.0009 | 0.3729  | -0.0003       | 0.0005 | 0.5711  | -0.0018    | 0.002  | 0.4229  | -0.001        | 0.002  | 0.6384  |

|                   |                |         |        |        |         |        |        |         |        |        |         |        |        |
|-------------------|----------------|---------|--------|--------|---------|--------|--------|---------|--------|--------|---------|--------|--------|
|                   | f              | -0.0031 | 0.0029 | 0.3211 | 0.0034  | 0.0016 | 0.0738 | -0.0084 | 0.0066 | 0.2495 | 0.0005  | 0.0065 | 0.9425 |
|                   | R <sup>2</sup> | 0.9222  | 0      | 0      | 0.8219  | 0      | 0      | 0.6887  | 0      | 0      | 0.7153  | 0      | 0      |
| R <sub>max</sub>  | a              | 0.7988  | 0.1894 | 0.0056 | 0.9894  | 0.0898 | 0      | 0.7842  | 0.2939 | 0.0371 | 0.891   | 0.4127 | 0.0742 |
|                   | b              | 0.0275  | 0.0207 | 0.2329 | -0.0074 | 0.0098 | 0.4811 | 0.0325  | 0.0322 | 0.3507 | -0.0045 | 0.0451 | 0.924  |
|                   | c              | -0.0684 | 0.0268 | 0.0435 | 0.0025  | 0.0127 | 0.8494 | -0.1085 | 0.0416 | 0.0402 | -0.0478 | 0.0584 | 0.4448 |
|                   | d              | 0.0033  | 0.0008 | 0.0062 | 0.001   | 0.0004 | 0.042  | 0.0048  | 0.0013 | 0.0089 | 0.0013  | 0.0018 | 0.4979 |
|                   | e              | -0.0008 | 0.0006 | 0.2206 | 0.0002  | 0.0003 | 0.4492 | -0.001  | 0.0009 | 0.3027 | 0.0006  | 0.0013 | 0.6742 |
|                   | f              | -0.0009 | 0.0019 | 0.6535 | -0.002  | 0.0009 | 0.068  | 0.0005  | 0.003  | 0.8806 | 0.0013  | 0.0042 | 0.7708 |
|                   | R <sup>2</sup> | 0.9675  | 0      | 0      | 0.9208  | 0      | 0      | 0.9491  | 0      | 0      | 0.8348  | 0      | 0      |
| R <sub>mean</sub> | a              | 0.7818  | 0.1208 | 0.0006 | 0.7407  | 0.1332 | 0.0014 | 0.9323  | 0.1479 | 0.0007 | 1.0529  | 0.2491 | 0.0055 |
|                   | b              | 0.0346  | 0.0132 | 0.0397 | 0.0214  | 0.0146 | 0.1917 | 0.0163  | 0.0162 | 0.3529 | -0.0231 | 0.0273 | 0.4295 |
|                   | c              | -0.0789 | 0.0171 | 0.0036 | -0.0176 | 0.0188 | 0.3875 | -0.1006 | 0.0209 | 0.003  | -0.0348 | 0.0353 | 0.3612 |
|                   | d              | 0.0037  | 0.0005 | 0.0004 | 0.0017  | 0.0006 | 0.0239 | 0.0053  | 0.0006 | 0.0002 | 0.0013  | 0.0011 | 0.2664 |
|                   | e              | -0.0011 | 0.0004 | 0.0272 | -0.0006 | 0.0004 | 0.234  | -0.0007 | 0.0005 | 0.1769 | 0.001   | 0.0008 | 0.2431 |
|                   | f              | -0.0006 | 0.0012 | 0.6371 | -0.0015 | 0.0014 | 0.3117 | -0.0011 | 0.0015 | 0.4783 | 0       | 0.0025 | 0.985  |
|                   | R <sup>2</sup> | 0.9869  | 0      | 0      | 0.9484  | 0      | 0      | 0.9864  | 0      | 0      | 0.9167  | 0      | 0      |
| D                 | a              | 1.1215  | 0.2245 | 0.0025 | 1.2327  | 0.2271 | 0.0016 | 0.4216  | 0.3695 | 0.2973 | 1.1097  | 0.3957 | 0.031  |
|                   | b              | -0.0344 | 0.0246 | 0.2107 | -0.0163 | 0.0248 | 0.5354 | 0.0577  | 0.0404 | 0.2034 | 0.0038  | 0.0433 | 0.9338 |
|                   | c              | 0.1156  | 0.0318 | 0.0109 | 0.014   | 0.0321 | 0.6779 | 0.1191  | 0.0523 | 0.0631 | 0.0275  | 0.056  | 0.6407 |
|                   | d              | -0.0032 | 0.001  | 0.0162 | -0.0025 | 0.001  | 0.0436 | -0.0023 | 0.0016 | 0.1938 | -0.001  | 0.0017 | 0.5882 |
|                   | e              | 0.001   | 0.0007 | 0.1983 | 0.0005  | 0.0007 | 0.525  | -0.0018 | 0.0012 | 0.1782 | -0.0005 | 0.0013 | 0.6977 |
|                   | f              | -0.0031 | 0.0023 | 0.2176 | 0.0031  | 0.0023 | 0.2237 | -0.0053 | 0.0038 | 0.2067 | 0.0003  | 0.004  | 0.936  |

|     |                |         |        |        |         |        |        |         |        |        |         |        |        |
|-----|----------------|---------|--------|--------|---------|--------|--------|---------|--------|--------|---------|--------|--------|
|     | R <sup>2</sup> | 0.9543  | 0      | 0      | 0.9041  | 0      | 0      | 0.8356  | 0      | 0      | 0.8179  | 0      | 0      |
| YPP | a              | 0.6759  | 0.2095 | 0.018  | 0.795   | 0.024  | 0      | 0.5375  | 0.4947 | 0.3189 | 0.7619  | 0.2059 | 0.0101 |
|     | b              | 0.0632  | 0.0229 | 0.0329 | 0.0343  | 0.0026 | 0      | 0.0928  | 0.0541 | 0.1369 | 0.0273  | 0.0225 | 0.2714 |
|     | c              | -0.09   | 0.0297 | 0.0232 | -0.0094 | 0.0034 | 0.033  | -0.155  | 0.0702 | 0.0694 | 0.0086  | 0.0292 | 0.7781 |
|     | d              | 0.0057  | 0.0009 | 0.0007 | 0.0005  | 0.0001 | 0.0028 | 0.01    | 0.0021 | 0.0033 | 0.0005  | 0.0009 | 0.6131 |
|     | e              | -0.0024 | 0.0007 | 0.0106 | -0.0011 | 0.0001 | 0      | -0.0037 | 0.0016 | 0.0562 | -0.0009 | 0.0006 | 0.233  |
|     | f              | -0.0025 | 0.0021 | 0.2868 | -0.0001 | 0.0002 | 0.591  | -0.0044 | 0.0051 | 0.4127 | -0.0013 | 0.0021 | 0.5738 |
|     | R <sup>2</sup> | 0.965   | 0      | 0      | 0.981   | 0      | 0      | 0.9364  | 0      | 0      | 0.3203  | 0      | 0      |
| SF  | a              | 0.7058  | 0.2625 | 0.0361 | 1.0542  | 0.0381 | 0      | 0.5525  | 0.4874 | 0.3002 | 0.9704  | 0.0406 | 0      |
|     | b              | 0.0597  | 0.0287 | 0.0825 | -0.0019 | 0.0042 | 0.6579 | 0.0964  | 0.0533 | 0.1203 | 0.0028  | 0.0044 | 0.5538 |
|     | c              | -0.0978 | 0.0373 | 0.0393 | -0.0106 | 0.0054 | 0.0981 | -0.1678 | 0.0692 | 0.0515 | 0.0027  | 0.0058 | 0.6501 |
|     | d              | 0.006   | 0.0011 | 0.0018 | 0.0003  | 0.0002 | 0.0793 | 0.0098  | 0.0021 | 0.0033 | 0       | 0.0002 | 0.9542 |
|     | e              | -0.0023 | 0.0008 | 0.0303 | 0       | 0.0001 | 0.9399 | -0.0038 | 0.0015 | 0.0493 | -0.0001 | 0.0001 | 0.5036 |
|     | f              | -0.0021 | 0.0027 | 0.4665 | 0.0003  | 0.0004 | 0.5025 | -0.0033 | 0.005  | 0.5279 | -0.0001 | 0.0004 | 0.7488 |
|     | R <sup>2</sup> | 0.9471  | 0      | 0      | 0.6531  | 0      | 0      | 0.9386  | 0      | 0      | 0.3938  | 0      | 0      |
| TGW | a              | 0.9542  | 0.1075 | 0.0001 | 0.8978  | 0.1365 | 0.0006 | 1.0268  | 0.0635 | 0      | 0.8488  | 0.0527 | 0      |
|     | b              | 0.0107  | 0.0118 | 0.3984 | 0.0206  | 0.0149 | 0.2158 | -0.0056 | 0.0069 | 0.4521 | 0.0198  | 0.0058 | 0.0137 |
|     | c              | -0.0059 | 0.0153 | 0.7111 | -0.0093 | 0.0194 | 0.6493 | -0.0013 | 0.009  | 0.8858 | -0.0141 | 0.0075 | 0.1084 |
|     | d              | -0.0003 | 0.0005 | 0.5362 | 0.0003  | 0.0006 | 0.6101 | 0.0001  | 0.0003 | 0.77   | 0.0004  | 0.0002 | 0.1214 |
|     | e              | -0.0003 | 0.0003 | 0.4056 | -0.0007 | 0.0004 | 0.1443 | 0.0002  | 0.0002 | 0.376  | -0.0006 | 0.0002 | 0.0137 |
|     | f              | 0.0008  | 0.0011 | 0.4765 | 0.0003  | 0.0014 | 0.8485 | 0       | 0.0006 | 1      | 0.0006  | 0.0005 | 0.3418 |
|     | R <sup>2</sup> | 0.3559  | 0      | 0      | 0.4369  | 0      | 0      | 0.4561  | 0      | 0      | 0.8885  | 0      | 0      |

YPP: yield per plant; SF: spikelet fertility; TGW: thousand grain weight; SNPP: spikelet number per panicle; SW<sub>m</sub>: spikelet weight at maturity; b: the shape or steepness of the sigmoid curve; t<sub>50</sub>: days from flowering to 50% grain filling; D: days from flowering to 95% SW<sub>m</sub>; R<sub>mean</sub>: mean grain filling rate; R<sub>max</sub>: maximum grain filling rate.
